# Supplementary material
Source: publisher figshare collection journal article supplement (https://gsajournals.figshare.com/ndownloader/files/12539693)
Supplement: Supplementary file 1 [file 12539693]

## Sheet: wing tips
Experiment 3: Genotypes of wing tips of Capensis x Scutata queens
	A14			A29		A88			A107		A113			B124			Sex	Maternity
RSA2016-510 - Queen	214	225		138	138	144	149		164	164	211	217		225	246		F
RSA2016-509 - Drone	216			138		152			176		223			232			M
RSA2017-17 (AI 105) wing tips	216	226		138	138	149	152		164	177	211	223		232	246		F	Q
RSA2017-19 (AI 106) wing tips	216	226		138	138	149	152		164	177	211	223		225	232		F	Q
RSA2017-21 (AI 107) wing tips	216	226		138	138	144	152		164	177	217	223		232	246		F	Q
RSA2017-23 (AI 108) wing tips	214	216		138	138	149	152		164	177	217	223		232	246		F	Q
RSA2017-25 (AI 109) wing tips	214	216	226	138	138	144	149	152	164	177	211	217	223	225	232	246	F	Q	triplod!
RSA2017-27 (AI 110) wing tips	216	226		138	138	144	152		164	177	217	223		225	232		F	Q
